# Supplementary material for: Magneto-structural correlations of cyclo-tetravanadates functionalized with mixed-ligand copper(ii) complexes
Source: Royal Society of Chemistry journal article supplement (doi:10.1039/d0nj06004f), 2021-01-01
Supplement: d0nj06004f1.pdf [file d0nj06004f1.pdf]

### ELECTRONIC SUPPORTING INFORMATION

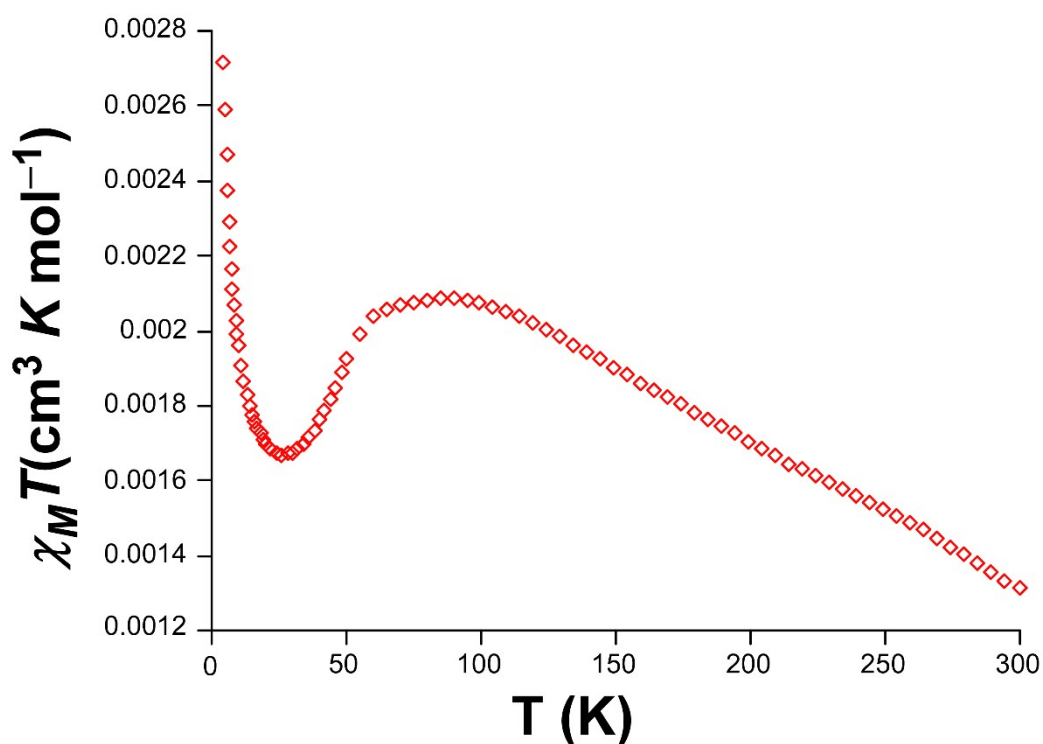

Figure S1.  $\chi_M T$  vs  $T$  plot for **1** under an  $H = 1000$  Oe in the 2–300 K range.

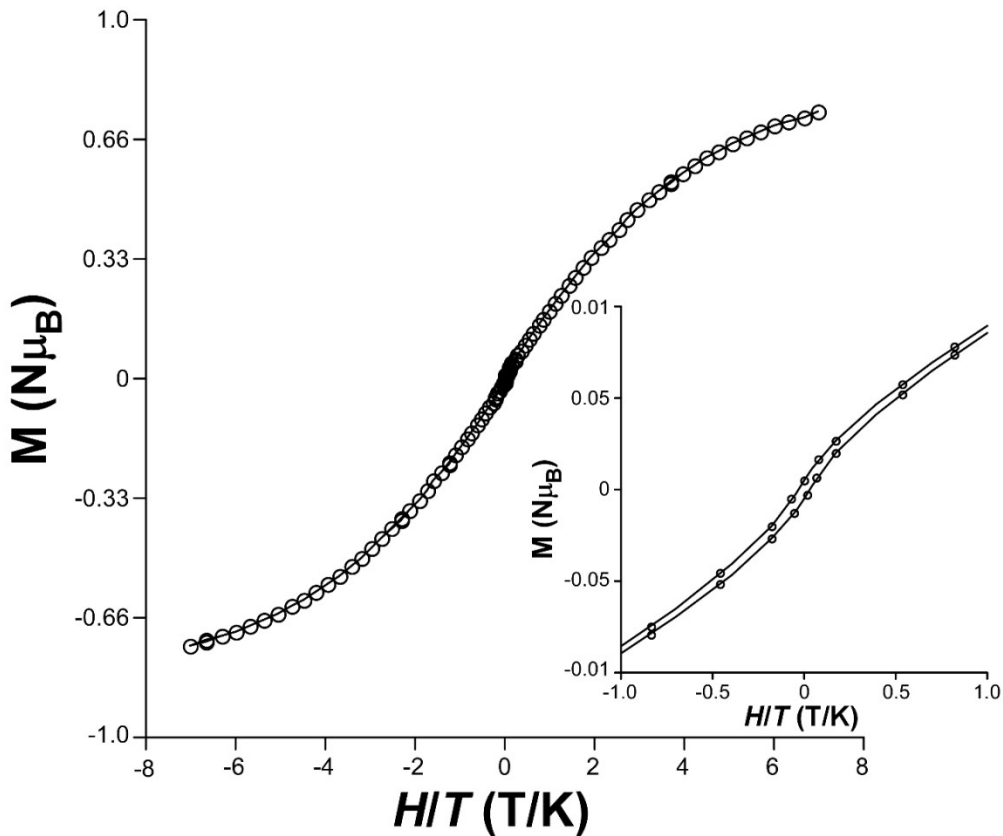

Figure S2. Hysteresis loop measured at 2 K in the  $\pm 7$  T range for compound **2**. Inset: detail of the aperture of the cycle at low applied fields.

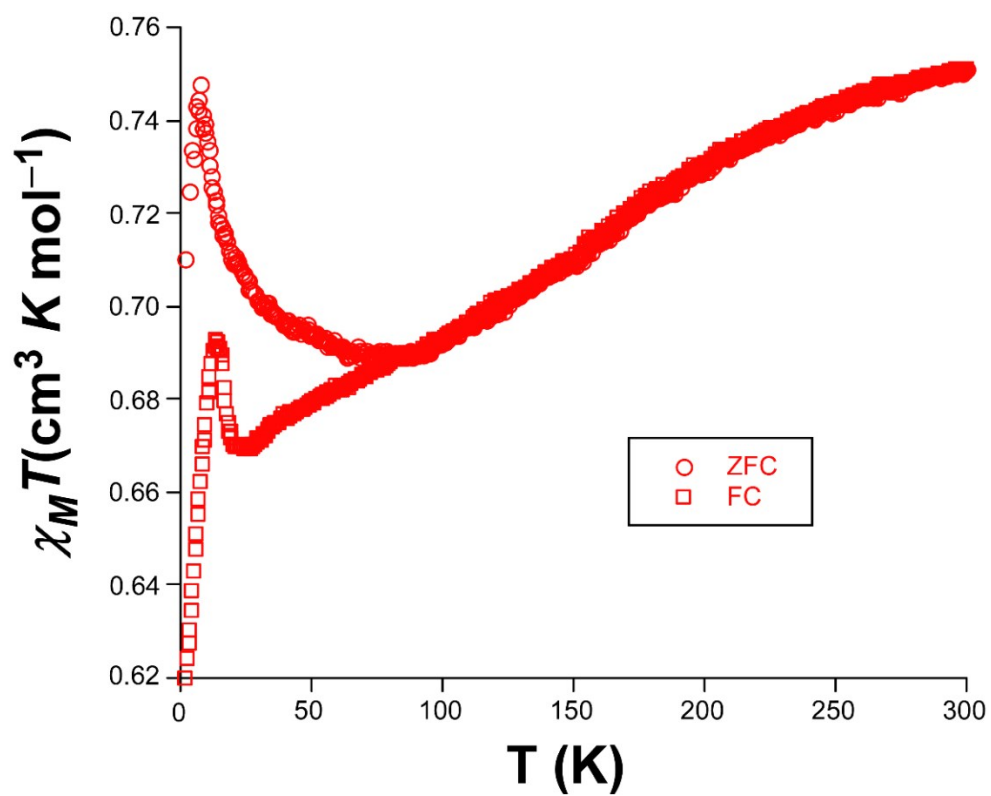

**Figure S3** ZFC and FC vs temperature curves for compound **3** under  $H= 100$  Oe.

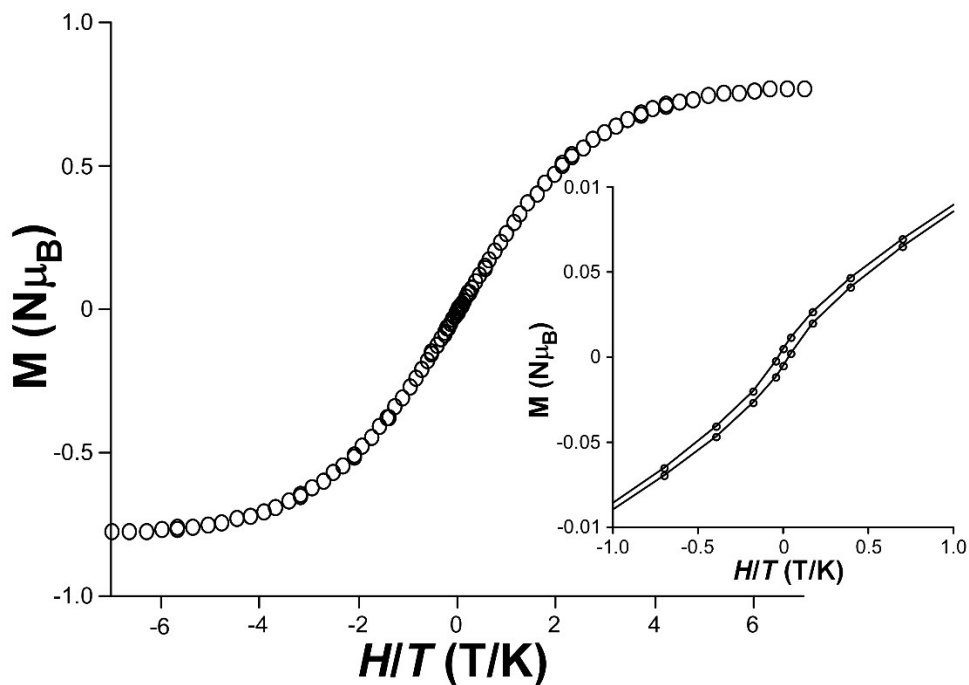

**Figure S4.** Hysteresis loop measured at 2 K in the  $\pm 7$  T range for compound **3**. Inset: detail of the aperture of the cycle at low applied fields.
